# Supplementary material for: Low sensitivity of a heavily calcified coccolithophore under increasing CO 2 : the case study of Helicosphaera carteri
Source: Copernicus journal article supplement (doi:10.5194/bg-22-1821-2025), 2025-04-14
Supplement: Supplementary file 1 [file bg-22-1821-2025-supplement.zip]

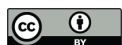

*Supplement of*

**Low sensitivity of a heavily calcified coccolithophore under increasing CO<sub>2</sub>: the case study of *Helicosphaera carteri***

**Stefania Bianco et al.**

*Correspondence to:* Gerald Langer (gerald.langer@cantab.net)

- bg-22-1821-2025-supplement-title-page.pdf
- Coccoliths-main
  - README.md

The copyright of individual parts of the supplement might differ from the article licence.
